# Supplementary material
Source: publisher site journal article supplement (https://www.spandidos-publications.com/3290/downloadSupplementary)
Supplement: Supplementary file 1 [file downloadSupplementary]

Figure S1. Western blotting density analysis. TSG101, tumor susceptibility gene 101 protein; CD9, cluster of differentiation 9; LUAD, lung adenocarcinoma.

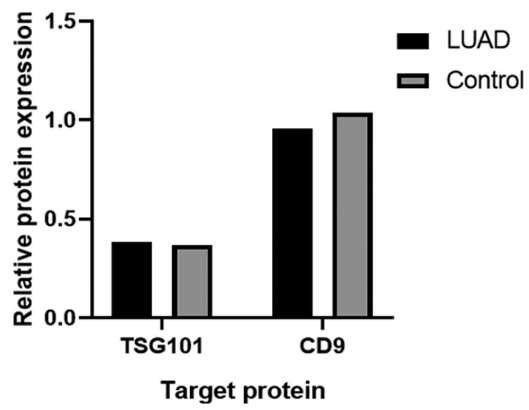

Figure S2. Standard curve for microRNA-10b.

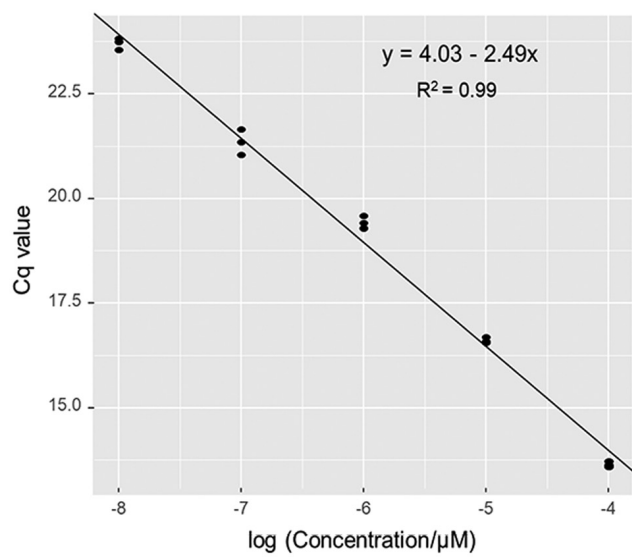

Figure S3. Correlation of expression levels of miR-10b in EVs and plasma with sex and age in 149 subjects. (A) Expression levels of EV-associated miR-10b in males and females. (B) Expression levels of plasma miR-10b in males and females. (C) Correlation between EV-associated miR-10b and age. (D) Correlation between plasma miR-10b and age. miR, microRNA; EV, extracellular vesicle.

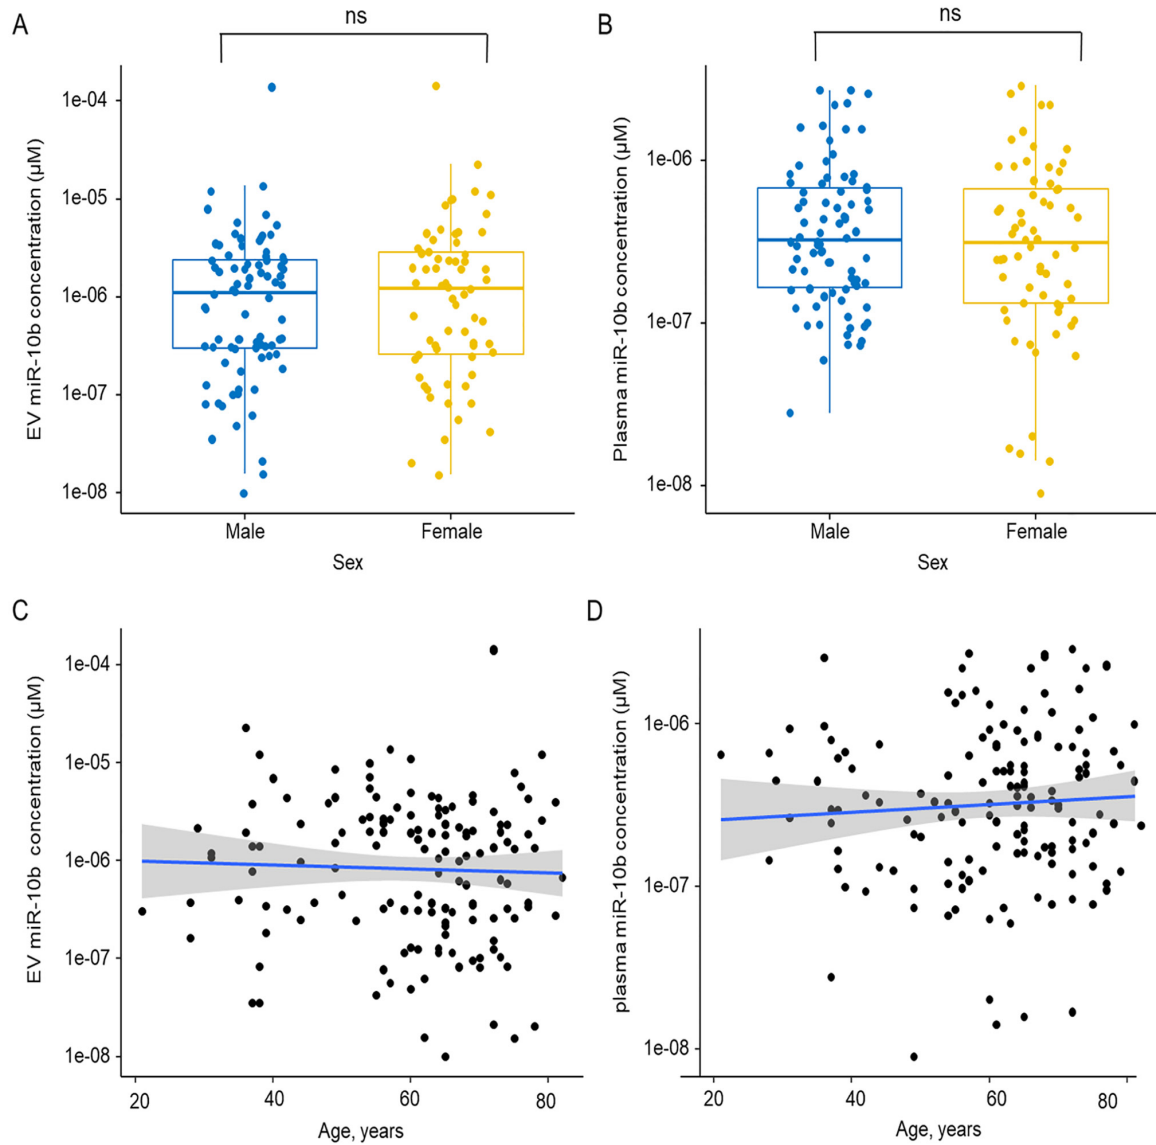

Table SI. The expression levels of the 7 miRNAs in the early stage and control groups.

| miRNA        | Log (fold of change) | Average expression | P-value  |
|--------------|----------------------|--------------------|----------|
| hsa-mir-141  | -74.6753             | 61.22222           | 0.014949 |
| hsa-let-7e   | -2.97403             | 1.611111           | 0.015091 |
| hsa-mir-10b  | -9.22078             | 9.222222           | 0.02282  |
| hsa-mir-668  | -4.67532             | 2                  | 0.025481 |
| hsa-mir-15a  | -4.85714             | 2.888889           | 0.032717 |
| hsa-mir-200a | -6.79221             | 3.277778           | 0.033753 |
| hsa-mir-433  | -4.16883             | 2.166667           | 0.038797 |
